# Supplementary material for: Impacts of Climate Change Interacting Abiotic Factors on Growth, aflD and aflR Gene Expression and Aflatoxin B1 Production by Aspergillus flavus Strains In Vitro and on Pistachio Nuts
Source: Toxins (Basel). 2021 May 28;13(6):385. doi: 10.3390/toxins13060385 (PMC8228473; doi:10.3390/toxins13060385)
Supplement: Supplementary file 1 [file toxins-13-00385-s001.zip › toxins-1178230-supplementary checked.pdf]

## Supplementary Materials: Impacts of Climate Change Interacting Abiotic Factors on Growth, *aflD* and *aflR* Gene Expression and Aflatoxin B<sub>1</sub> Production by *Aspergillus flavus* Strains *in vitro* and on Pistachio Nuts

**Table S1.** Sequencing results of isolated strains and type strain using ITS1 & 2 and ITS3 & 4 primer pairs for molecular identification of strains AB3 and AB10. \* Type strain from the Agricultural Research Services Laboratories of the US Department of Agriculture USDA, New Orleans).

| Strain ID   | GenBank ID |            | Genus              | Species       | Similarity (%) |
|-------------|------------|------------|--------------------|---------------|----------------|
|             | ITS1 & 2   | ITS 3 & 4  |                    |               |                |
| NRRL 3357 * | M1204.653  | BP4        | <i>Aspergillus</i> | <i>flavus</i> | 100/99         |
| AB3         | A4S3_13    | SCAU-F-142 | <i>Aspergillus</i> | <i>flavus</i> | 100/98         |
| AB10        | M1204.653  | LPSC 1183  | <i>Aspergillus</i> | <i>flavus</i> | 100/99         |
